# Supplementary material
Source: PubMed Central journal article supplement (PMC5777571)
Supplement: NIHMS70954-supplement-Supplementary_tables_1-2.pdf [file NIHMS70954-supplement-Supplementary_tables_1-2.pdf]

**Supplementary Table 1. Summary of targeting using CRISPR-FLIP strategy.**

| Targeted gene                       | Total No. of clones | No. of clones with correct insertion of FLIP | Targeting efficiency (%) | FLIP/+ clones | FLIP/- clones (total) | FLIP/- in-frame | FLIP/- out of frame | Misc. (mixed, not sequence confirmed clones and potentially empty wells) |
|-------------------------------------|---------------------|----------------------------------------------|--------------------------|---------------|-----------------------|-----------------|---------------------|--------------------------------------------------------------------------|
| <i>Apc</i>                          | 89                  | 27                                           | 30.3%                    | 13            | 6                     | 0               | 6                   | 8                                                                        |
| <i>Cttnb1</i>                       | 64                  | 14                                           | 21.9%                    | 7             | 6                     | 2               | 4                   | 1                                                                        |
| <i>Esrrb</i>                        | 192                 | 52                                           | 27.1%                    | 25            | 4                     | 1               | 3                   | 23                                                                       |
| <i>Nfx1</i>                         | 96                  | 19                                           | 19.8%                    | 4             | 3                     | 1               | 2                   | 12                                                                       |
| <i>Sox2</i>                         | 192                 | 58                                           | 30.2%                    | 37            | 3                     | 2               | 1                   | 18                                                                       |
| <i>Tcf7l2</i>                       | 96                  | 39                                           | 40.6%                    | 17            | 14                    | 3               | 11                  | 8                                                                        |
| <i>Trim13</i>                       | 96                  | 21                                           | 21.9%                    | 4             | 4                     | 0               | 4                   | 13                                                                       |
| <i>Trim37</i>                       | 96                  | 28                                           | 29.2%                    | 4             | 8                     | 3               | 5                   | 16                                                                       |
| <i>ARID1A</i><br>(HEK293- aneuloid) | 192                 | 18                                           | 9.4%                     | 6             | 3                     | 0               | 3                   | 9                                                                        |
| <i>TP53</i><br>(HEK293 - aneuploid) | 104                 | 42                                           | 40.4%                    | 2             | 8                     | 3               | 5                   | 32                                                                       |
| <i>TP53</i> (hiPSC)                 | 32                  | 24                                           | 75.0%                    | 12            | 4                     | 2               | 2                   | 8                                                                        |

**Supplementary Table 2. Primers used for quantitative RT-PCR**

| Sample   | Forward (5'-3')          | Reverse (5'-3')          |
|----------|--------------------------|--------------------------|
| Ex5      | GCTGTTATGGTCCATCAGCTTT   | AGACTTAAAGATGGCCAGCAAG   |
| Ex5-IntR | CTAAAGCGCATGCTCCAGACT    | AACGAGCTGTCTCTACATCATTTG |
| Ex7-8    | CCCAAGCCTTAGTAAACATAATGA | GGTTTCTGAGAGTCCAAGACAGT  |
| Ex8-IntR | ACATGAGTTATCACTGGCAAGGTA | GGTTTCTGAGAGTCCAAGACAGT  |
